# Supplementary material
Source: PubMed Central journal article supplement (PMC2583298)

## Supplementary Figure 1

NE, CG and P3 serine proteinases lack bactericidal activity under the conditions of these assays. Exponentially growing *S. Typhimurium*  $\Delta PhoP$  were exposed to NE (panel A), CG (panel B) and P3 (panel C) at 37° C in 50  $\mu$ L of PIPES-TSB buffer for 1 h (see “Experimental Procedures”). Following protease exposure, the bacteria were plated on TSB-agar and incubated overnight at 37° C. Surviving bacteria were counted as CFU/mL at each peptide concentration. Plate counts below  $1 \times 10^3$  CFU/mL signify that no colonies were detected. NE and P3 are not bactericidal at all peptide concentrations tested, but CG bactericidal activity is detectable at 10  $\mu$ g/ml. In these experiments, however, proRMAD-4 digests and assays were performed at  $\sim 1$   $\mu$ g/ml of proteinase (see “Experimental Procedures”) and thus the enzymes are not present at bactericidal concentrations.

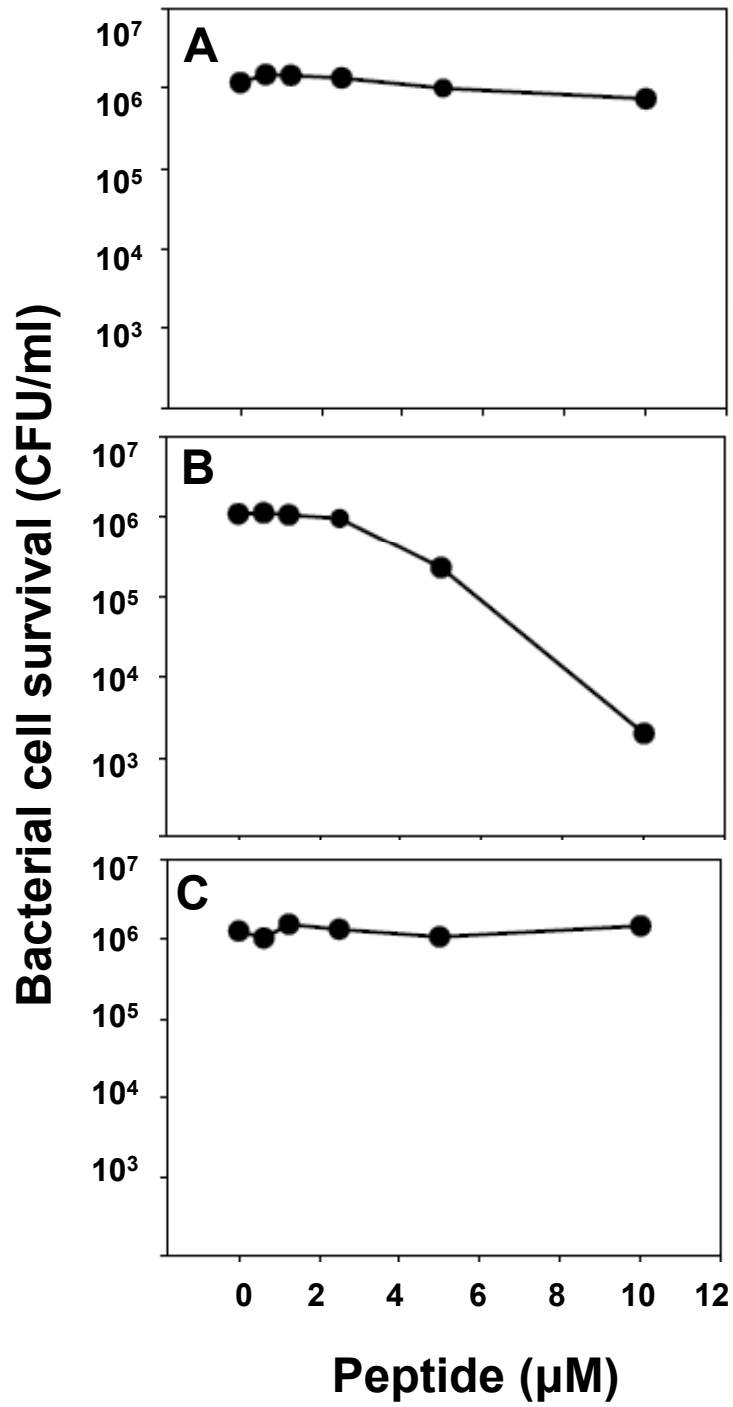

Supplement: M805296200_1.pdf [file M805296200_1.pdf]
